# Supplementary material for: National survey and point prevalence study of sedation practice in UK critical care
Source: Crit Care. 2016 Oct 27;20:355. doi: 10.1186/s13054-016-1532-x (PMC5084331; doi:10.1186/s13054-016-1532-x)
Supplement: Additional file 7: Table S5. — National survey: first choice of sedative analgesic delivery regimen reported by units. (PDF 59 kb) [file 13054_2016_1532_MOESM7_ESM.pdf]

Table S5 National survey – first choice of sedative/analgesic delivery regimen reported by units

| <b>Sedative/analgesic delivery regimen</b>                   | <b>Units, n (%)</b> |
|--------------------------------------------------------------|---------------------|
| Single sedative agent                                        | 9 (4.2)             |
| Sedative(s) in combination with one or more analgesic agents | 177 (82.7)          |
| Multiple sedatives together                                  | 2 (0.9)             |
| Not reported                                                 | 26 (12.1)           |
