# Supplementary material for: National survey and point prevalence study of sedation practice in UK critical care
Source: Springer Nature journal article supplement (doi:10.1186/s13054-016-1532-x), 2016-10-27
Supplement: MOESM2 [file 10996576]

## Sedation practice in critical care - point prevalence study

Please complete for each patient in your unit at **14:00 on 11 December 2013**

### HOSPITAL DETAILS

|                |
|----------------|
| Hospital name: |
|----------------|

### PATIENT DETAILS

|                                                                                                                                                                                      |             |
|--------------------------------------------------------------------------------------------------------------------------------------------------------------------------------------|-------------|
| CMP Admission number:                                                                                                                                                                | NHS number: |
| Has the patient received a sedative/analgesic agent in last 24 hours? Yes <input type="checkbox"/> No <input type="checkbox"/> <i>(If YES, please complete the rest of the form)</i> |             |

### SEDATION SCORE at 14:00 on 11 December, or most recent in last 24 hours, while **not** on sedation hold

|                                                                                                                                      |                                        |
|--------------------------------------------------------------------------------------------------------------------------------------|----------------------------------------|
| Instrument:<br>(e.g. Ramsay, RASS)                                                                                                   | Score:<br>(while not on sedation hold) |
| Has the patient been considered for a 'sedation hold' in the last 24 hours? Yes <input type="checkbox"/> No <input type="checkbox"/> |                                        |
| Has the patient been on a 'sedation hold' in the last 24 hours? Yes <input type="checkbox"/> No <input type="checkbox"/>             |                                        |

### VENTILATION during the period: 14:00 on 10 December to 13:59 on 11 December

|                                                                                                                                          |                                                                                         |
|------------------------------------------------------------------------------------------------------------------------------------------|-----------------------------------------------------------------------------------------|
| Neuromuscular blocking agent:<br><i>(except for transfer and/or intubation)</i> Yes <input type="checkbox"/> No <input type="checkbox"/> | Ventilated via a tracheostomy? Yes <input type="checkbox"/> No <input type="checkbox"/> |
|------------------------------------------------------------------------------------------------------------------------------------------|-----------------------------------------------------------------------------------------|

### SEDATIVE AGENTS (please refer to guidance notes)

Continuous infusions received during the period: **14:00 on 10 December to 13:59 on 11 December**

|   | Name of sedative agent | Highest dose (mg/hour) | Route (e.g. IV) | Total dose (mg) | For delirium?                                            |
|---|------------------------|------------------------|-----------------|-----------------|----------------------------------------------------------|
| 1 |                        |                        |                 |                 | Yes <input type="checkbox"/> No <input type="checkbox"/> |
| 2 |                        |                        |                 |                 | Yes <input type="checkbox"/> No <input type="checkbox"/> |
| 3 |                        |                        |                 |                 | Yes <input type="checkbox"/> No <input type="checkbox"/> |

Boluses received during the period: **14:00 on 10 December to 13:59 on 11 December**

|   | Name of sedative | Route (e.g. IV) | Total dose (mg) | For delirium?                                            |
|---|------------------|-----------------|-----------------|----------------------------------------------------------|
| 1 |                  |                 |                 | Yes <input type="checkbox"/> No <input type="checkbox"/> |
| 2 |                  |                 |                 | Yes <input type="checkbox"/> No <input type="checkbox"/> |
| 3 |                  |                 |                 | Yes <input type="checkbox"/> No <input type="checkbox"/> |

### ANALGESIC AGENTS

Continuous infusions received during the period: **14:00 on 10 December to 13:59 on 11 December**

|   | Name of analgesic agent | Highest dose (mg/hour) | Route (e.g. IV, epidural) | Total dose (mg) |
|---|-------------------------|------------------------|---------------------------|-----------------|
| 1 |                         |                        |                           |                 |
| 2 |                         |                        |                           |                 |
| 3 |                         |                        |                           |                 |

Boluses received during the period: **14:00 on 10 December to 13:59 on 11 December**

|   | Name of analgesic agent | Route (e.g. IV, epidural) | Total dose (mg) |
|---|-------------------------|---------------------------|-----------------|
| 1 |                         |                           |                 |
| 2 |                         |                           |                 |
| 3 |                         |                           |                 |

## Guidance

---

### SEDATION SCORE

If no sedation score (while not on sedation hold) in the last 24-hours, please enter "Not done" in the **Sedation score** field.

### SEDATIVE AGENTS

Do **not** include sedative agents given for night-time sedation or to facilitate sleep.

#### Continuous infusion

- **Highest dose** – please record the highest dose of sedative agent given during periods of stability (i.e. not during a procedure that necessitated increased sedation)
- **For delirium** – agents given to manage delirium (e.g. Haloperidol) should be included under Sedative agents and the **Yes** box ticked to indicate that the primary reason was to manage delirium. If the primary reason for administration was sedation, the **No** box should be ticked.

For any queries on Wednesday 11 December 2013, please call **020 7269 9295**, otherwise call the ICNARC CTU on **020 7269 9277**.
