# Supplementary material for: National survey and point prevalence study of sedation practice in UK critical care
Source: Springer Nature journal article supplement (doi:10.1186/s13054-016-1532-x), 2016-10-27
Supplement: MOESM3 [file 10996576]

Table S1 National survey – unit characteristics by response

| Characteristic                          | Questionnaire received, n (%) |           |
|-----------------------------------------|-------------------------------|-----------|
|                                         | Yes (n=214)                   | No (n=21) |
| Country:                                |                               |           |
| England                                 | 175 (92.6)                    | 14 (7.4)  |
| Scotland                                | 20 (90.9)                     | 2 (9.1)   |
| Wales                                   | 10 (66.7)                     | 5 (33.3)  |
| Northern Ireland                        | 9 (100)                       | 0 (0)     |
| Hospital type:                          |                               |           |
| University                              | 66 (89.2)                     | 8 (10.8)  |
| University affiliated                   | 40 (95.2)                     | 2 (4.8)   |
| Non-university                          | 108 (90.8)                    | 11 (9.2)  |
| Critical care unit size:                |                               |           |
| 1 to 6 beds                             | 32 (88.9)                     | 4 (11.1)  |
| 7 to 10 beds                            | 79 (88.8)                     | 10 (11.2) |
| 11 or more beds                         | 103 (93.6)                    | 7 (6.4)   |
| Participates in the Case Mix Programme: |                               |           |
| Yes                                     | 185 (90.7)                    | 19 (9.3)  |
| No <sup>a</sup>                         | 29 (93.6)                     | 2 (6.5)   |

<sup>a</sup> Includes all critical care units in Scotland, which participate in the Scottish Intensive Care Society Audit Group audit
