# Supplementary material for: National survey and point prevalence study of sedation practice in UK critical care
Source: Springer Nature journal article supplement (doi:10.1186/s13054-016-1532-x), 2016-10-27
Supplement: MOESM4 [file 10996576]

Table S2 National survey – sedation scale/score in use reported by units

| <b>Sedation scale/score</b>                | <b>Units, n (%)</b> |
|--------------------------------------------|---------------------|
| Richmond Agitation Sedation Scale          | 130 (64.7)          |
| Ramsay Sedation Scale                      | 50 (24.9)           |
| Riker Sedation Agitation Scale             | 7 (3.5)             |
| Bloomsbury Sedation Scale                  | 3 (1.0)             |
| Motor Activity Assessment Scale            | 1 (0.5)             |
| Modified Richmond Agitation Sedation Scale | 1 (0.5)             |
| Modified Ramsay Sedation Scale             | 6 (3.0)             |
| Local scale/score                          | 2 (1.0)             |
| Not reported                               | 1 (0.5)             |
