# Supplementary material for: National survey and point prevalence study of sedation practice in UK critical care
Source: Springer Nature journal article supplement (doi:10.1186/s13054-016-1532-x), 2016-10-27
Supplement: MOESM5 [file 10996576]

Table S3 National survey – first choice sedative agent reported by units

| <b>Sedative agent</b> | <b>Units, n (%)<sup>a</sup></b> |
|-----------------------|---------------------------------|
| Propofol              | 189 (88.3)                      |
| Midazolam             | 13 (6.1)                        |
| Not reported          | 15 (7.0)                        |

<sup>a</sup> Three units reported both propofol and midazolam as their first choice
