# Supplementary material for: National survey and point prevalence study of sedation practice in UK critical care
Source: Springer Nature journal article supplement (doi:10.1186/s13054-016-1532-x), 2016-10-27
Supplement: MOESM6 [file 10996576]

Table S4 National survey – first choice analgesic agent reported by units

| <b>Analgesic agent</b> | <b>Units, n (%)<sup>a</sup></b> |
|------------------------|---------------------------------|
| Alfentanil             | 85 (39.7)                       |
| Fentanyl               | 56 (26.2)                       |
| Morphine               | 42 (19.6)                       |
| Remifentanil           | 32 (15.0)                       |
| Paracetamol            | 1 (0.5)                         |
| Not reported           | 7 (3.3)                         |

<sup>a</sup> Five units reported both morphine and alfentanil as their first choice; two units reported both morphine and remifentanil as their first choice; one unit reported both morphine and fentanyl as their first choice; one unit reported both alfentanil and remifentanil as their first choice
