# Supplementary material for: National survey and point prevalence study of sedation practice in UK critical care
Source: Springer Nature journal article supplement (doi:10.1186/s13054-016-1532-x), 2016-10-27
Supplement: MOESM8 [file 10996576]

Table S6 National survey – factors determining the choice of sedative/analgesic agents reported by units

| <b>Factor</b>                                   | <b>Reported importance, <i>n</i> (%)</b> |                                          |                                          |                     |
|-------------------------------------------------|------------------------------------------|------------------------------------------|------------------------------------------|---------------------|
|                                                 | <b>Very important/ Important</b>         | <b>Neither important nor unimportant</b> | <b>Unimportant/ Not at all important</b> | <b>Not reported</b> |
| Cost                                            | 102 (47.7)                               | 79 (36.9)                                | 31 (14.5)                                | 2 (0.9)             |
| Expected duration for sedation and/or analgesia | 176 (82.2)                               | 18 (8.4)                                 | 18 (8.4)                                 | 2 (0.9)             |
