# Supplementary material for: National survey and point prevalence study of sedation practice in UK critical care
Source: Springer Nature journal article supplement (doi:10.1186/s13054-016-1532-x), 2016-10-27
Supplement: MOESM9 [file 10996576]

Table S7 Characteristics of units in the Case Mix Programme at the time of the point prevalence study (14.00 on 11 December 2013) by units that did and did not participate in the point prevalence study

| <b>Characteristic</b>              | <b>Unit participated in the point prevalence study, n (%)</b> |                   |
|------------------------------------|---------------------------------------------------------------|-------------------|
|                                    | <b>Yes (n=50)</b>                                             | <b>No (n=133)</b> |
| Country:                           |                                                               |                   |
| England                            | 46 (92.0)                                                     | 118 (88.7)        |
| Wales                              | 1 (2.0)                                                       | 10 (7.5)          |
| Northern Ireland                   | 3 (6.0)                                                       | 5 (3.8)           |
| Hospital type:                     |                                                               |                   |
| University                         | 12 (24.0)                                                     | 37 (27.8)         |
| University affiliated              | 14 (28.0)                                                     | 21 (15.8)         |
| Non-university                     | 24 (48.0)                                                     | 75 (56.4)         |
| Critical care unit size:           |                                                               |                   |
| 1 to 6 beds                        | 8 (16.0)                                                      | 17 (12.8)         |
| 7 to 10 beds                       | 15 (30.0)                                                     | 57 (42.9)         |
| 11 or more beds                    | 27 (54.0)                                                     | 59 (44.4)         |
| Proportion of surgical admissions: |                                                               |                   |
| 40% or less                        | 32 (64.0)                                                     | 80 (60.2)         |
| Greater than 40%                   | 18 (36.0)                                                     | 53 (39.8)         |
