# Supplementary material for: National survey and point prevalence study of sedation practice in UK critical care
Source: Springer Nature journal article supplement (doi:10.1186/s13054-016-1532-x), 2016-10-27
Supplement: MOESM10 [file 10996576]

Table S8 Characteristics of patients in Case Mix Programme units at the time of the point prevalence study (14.00 on 11 December 2013) by units that did and did not participate in the point prevalence study

| Characteristic <sup>a</sup>                                                    | Unit participated in the point prevalence study |                   |
|--------------------------------------------------------------------------------|-------------------------------------------------|-------------------|
|                                                                                | Yes (n=50)                                      | No (n=133)        |
| Patients, <i>n</i>                                                             | 516                                             | 1,296             |
| Age, <i>mean (SD)</i>                                                          | 61.7 (15.6)                                     | 63.2 (15.9)       |
| Gender, <i>n (%)</i> :                                                         |                                                 |                   |
| Female                                                                         | 224 (43.4)                                      | 571 (44.1)        |
| Male                                                                           | 292 (56.6)                                      | 725 (55.9)        |
| Ethnicity, <i>n (%)</i> :                                                      |                                                 |                   |
| White                                                                          | 475 (94.3)                                      | 1,175 (93.0)      |
| Black or Black British                                                         | 12 (2.4)                                        | 32 (2.5)          |
| Asian or Asian British                                                         | 11 (2.2)                                        | 34 (2.7)          |
| Mixed                                                                          | 2 (0.4)                                         | 9 (0.7)           |
| Other ethnic group                                                             | 4 (0.8)                                         | 13 (1.0)          |
| Severe co-morbidities, <i>n (%)</i> :                                          |                                                 |                   |
| Liver co-morbidity                                                             | 13 (2.5)                                        | 44 (3.4)          |
| Renal co-morbidity                                                             | 5 (1.0)                                         | 28 (2.2)          |
| Respiratory co-morbidity                                                       | 12 (2.3)                                        | 45 (3.5)          |
| Cardiovascular co-morbidity                                                    | 7 (1.4)                                         | 28 (2.2)          |
| Haematological malignancy                                                      | 7 (1.4)                                         | 26 (2.0)          |
| Metastatic disease                                                             | 12 (2.3)                                        | 27 (2.1)          |
| Immunosuppression                                                              | 50 (9.7)                                        | 96 (7.4)          |
| Surgical status, <i>n (%)</i> :                                                |                                                 |                   |
| Elective/scheduled                                                             | 70 (13.6)                                       | 157 (12.1)        |
| Emergency/urgent                                                               | 82 (15.9)                                       | 236 (18.2)        |
| Non-surgical                                                                   | 364 (70.5)                                      | 903 (69.7)        |
| Primary/secondary reason for admission, <i>n (%)</i> :                         |                                                 |                   |
| Admissions following trauma                                                    | 62 (12.0)                                       | 177 (13.7)        |
| Admissions with neurological condition                                         | 46 (9.0)                                        | 109 (8.5)         |
| ICNARC Physiology Score, <i>mean (SD)</i>                                      | 20.2 (8.7)                                      | 20.2 (8.7)        |
| ICNARC model (2013 recalibration) predicted risk of death, <i>median (IQR)</i> | 0.23 (0.08, 0.44)                               | 0.24 (0.08, 0.45) |
| APACHE II Acute Physiology Score, <i>mean (SD)</i>                             | 13.1 (5.5)                                      | 13.1 (5.8)        |
| APACHE II Score, <i>mean (SD)</i>                                              | 17.4 (6.1)                                      | 17.7 (6.5)        |
| APACHE II (2013 recalibration) predicted risk of death, <i>median (IQR)</i>    | 0.22 (0.10, 0.38)                               | 0.22 (0.10, 0.38) |
| Mechanical ventilation – 1 <sup>st</sup> 24 hours, <i>n (%)</i>                | 306 (59.3)                                      | 711 (55.0)        |
| Time (days) since admission to critical care, <i>mean (SD)</i>                 | 9.0 (13.3)                                      | 8.3 (10.8)        |

SD: standard deviation; ICNARC: Intensive Care National Audit & Research Centre; IQR: interquartile range; APACHE: Acute Physiology And Chronic Health Evaluation

<sup>a</sup> Case mix was assessed by: age; sex; ethnicity; severe co-morbidities; surgical status; primary/secondary reason for unit admission; acute severity of illness; and time since admission to the critical care unit
