# Supplementary material for: National survey and point prevalence study of sedation practice in UK critical care
Source: Springer Nature journal article supplement (doi:10.1186/s13054-016-1532-x), 2016-10-27
Supplement: MOESM11 [file 10996576]

Table S9 Outcome and length of stay for patients in Case Mix Programme units on the day of the point prevalence study (14.00 on 11 December 2013) by units that did and did not participate in the point prevalence study

| <b>Outcome<sup>a</sup> and length of stay<sup>b</sup></b> | <b>Participated in the point prevalence study</b> |                   |
|-----------------------------------------------------------|---------------------------------------------------|-------------------|
|                                                           | <b>Yes (n=50)</b>                                 | <b>No (n=133)</b> |
| Number of patients                                        | 516                                               | 1,296             |
| Deaths – critical care, <i>n (%)</i>                      | 80 (15.5)                                         | 199 (15.4)        |
| Deaths – acute hospital <sup>c</sup> , <i>n (%)</i>       | 121 (25.0)                                        | 331 (26.9)        |
| LOS (days) – critical care, <i>mean (SD)</i>              |                                                   |                   |
| Survivors                                                 | 17.3 (19.6)                                       | 16.2 (18.8)       |
| Non-survivors                                             | 16.7 (18.0)                                       | 18.7 (21.1)       |
| LOS (days) – critical care, <i>median (IQR)</i>           |                                                   |                   |
| Survivors                                                 | 9.6 (3.9, 23.3)                                   | 9.2 (4.0, 21.7)   |
| Non-survivors                                             | 10.4 (4.7, 24.6)                                  | 12.4 (5.0, 23.9)  |
| LOS (days) – acute hospital, <i>mean (SD)</i>             |                                                   |                   |
| Survivors                                                 | 42.1 (42.3)                                       | 41.7 (55.4)       |
| Non-survivors                                             | 31.0 (32.5)                                       | 31.4 (30.2)       |
| LOS (days) – acute hospital, <i>median (IQR)</i>          |                                                   |                   |
| Survivors                                                 | 28 (12, 60)                                       | 28 (13, 55)       |
| Non-survivors                                             | 23 (9, 38)                                        | 21 (10, 45)       |

LOS: length of stay; SD: standard deviation; IQR: interquartile range

<sup>a</sup> Outcome was assessed by mortality at unit and acute hospital discharge

<sup>b</sup> Length of stay was assessed both in the unit and for the total stay in an acute hospital and was stratified by outcome

<sup>c</sup> Acute hospital outcomes missing for 96 patients (32 from units participating in the point prevalence study, 64 from units not participating in the point prevalence study) at the point of data lock
