# Supplementary material for: National survey and point prevalence study of sedation practice in UK critical care
Source: Springer Nature journal article supplement (doi:10.1186/s13054-016-1532-x), 2016-10-27
Supplement: MOESM12 [file 10996576]

Table S10 Sedation score/scale in use reported in the national survey by units that did and did not participate in the point prevalence study

| <b>Sedation scale/score<sup>a</sup></b> | <b>Unit participated in the point prevalence study, n (%)</b> |                   |
|-----------------------------------------|---------------------------------------------------------------|-------------------|
|                                         | <b>Yes (n=51)</b>                                             | <b>No (n=163)</b> |
| Richmond Agitation Sedation Scale       | 34 (68.0)                                                     | 96 (63.6)         |
| Ramsay Sedation Scale                   | 12 (24.0)                                                     | 38 (25.2)         |
| Riker Sedation Agitation Scale          | 2 (4.0)                                                       | 5 (3.3)           |
| Bloomsbury Sedation Scale               | 0 (0)                                                         | 3 (2.0)           |
| Other                                   | 2 (4.0)                                                       | 8 (5.3)           |
| Not reported                            | 0 (0)                                                         | 1 (0.7)           |

<sup>a</sup> 13 units (one participating in point prevalence study, 12 not participating in point prevalence study) reported not routinely using a sedation scale/score
