# Supplementary material for: National survey and point prevalence study of sedation practice in UK critical care
Source: Springer Nature journal article supplement (doi:10.1186/s13054-016-1532-x), 2016-10-27
Supplement: MOESM13 [file 10996576]

Table S11 Sedative agents, analgesic agents and sedative/analgesic delivery regimens and their reported frequency of use in the national survey by units that did and did not participate in the point prevalence study

|                                                              | Reported frequency of use, <i>n</i> (%) |                              |                          |                              |                          |                              |                          |                              |
|--------------------------------------------------------------|-----------------------------------------|------------------------------|--------------------------|------------------------------|--------------------------|------------------------------|--------------------------|------------------------------|
|                                                              | Very frequently/<br>Frequently          |                              | Occasionally/Rarely      |                              | Never                    |                              | Not reported             |                              |
|                                                              | PPS<br>unit <sup>a</sup>                | Non-PPS<br>unit <sup>b</sup> | PPS<br>unit <sup>a</sup> | Non-PPS<br>unit <sup>b</sup> | PPS<br>unit <sup>a</sup> | Non-PPS<br>unit <sup>b</sup> | PPS<br>unit <sup>a</sup> | Non-PPS<br>unit <sup>b</sup> |
| <b>Sedative agent:</b>                                       |                                         |                              |                          |                              |                          |                              |                          |                              |
| Propofol                                                     | 51 (100)                                | 159 (97.5)                   | 0 (0)                    | 2 (1.2)                      | 0 (0)                    | 0 (0)                        | 0 (0)                    | 2 (1.2)                      |
| Midazolam                                                    | 15 (29.4)                               | 54 (33.1)                    | 32 (62.7)                | 98 (60.1)                    | 4 (7.8)                  | 7 (4.3)                      | 0 (0)                    | 4 (2.5)                      |
| Diazepam                                                     | 0 (0)                                   | 4 (2.5)                      | 20 (39.2)                | 76 (46.6)                    | 30 (58.8)                | 75 (46.0)                    | 1 (2.0)                  | 8 (4.9)                      |
| Lorazepam                                                    | 0 (0)                                   | 2 (1.2)                      | 27 (52.9)                | 93 (57.1)                    | 23 (45.1)                | 60 (36.8)                    | 1 (2.0)                  | 8 (4.9)                      |
| Clonidine                                                    | 18 (35.3)                               | 52 (31.9)                    | 30 (58.8)                | 99 (60.7)                    | 3 (5.8)                  | 5 (3.1)                      | 0 (0)                    | 7 (4.3)                      |
| Dexmedetomidine                                              | 6 (11.8)                                | 16 (9.8)                     | 11 (21.6)                | 46 (28.2)                    | 33 (64.7)                | 94 (57.7)                    | 1 (2.0)                  | 7 (4.3)                      |
| Haloperidol                                                  | 12 (23.5)                               | 67 (41.1)                    | 31 (60.8)                | 84 (51.5)                    | 6 (11.8)                 | 7 (4.3)                      | 2 (3.9)                  | 5 (3.1)                      |
| Atypical anti-psychotic <sup>c</sup>                         | 5 (9.8)                                 | 10 (6.1)                     | 19 (37.3)                | 75 (46.0)                    | 23 (45.1)                | 66 (40.5)                    | 4 (7.8)                  | 12 (7.4)                     |
| Other                                                        | 8 (15.7)                                | 18 (11.0)                    | 3 (5.9)                  | 9 (5.5)                      | -                        | -                            | 40 (78.4)                | 136 (83.4)                   |
| <b>Analgesic agent:</b>                                      |                                         |                              |                          |                              |                          |                              |                          |                              |
| Morphine                                                     | 18 (35.3)                               | 72 (44.2)                    | 31 (60.8)                | 83 (50.9)                    | 1 (2.0)                  | 5 (3.1)                      | 1 (2.0)                  | 3 (1.8)                      |
| Fentanyl                                                     | 17 (33.3)                               | 60 (36.8)                    | 20 (39.2)                | 69 (42.3)                    | 14 (27.5)                | 27 (16.6)                    | 0 (0)                    | 7 (4.3)                      |
| Alfentanil                                                   | 26 (51.0)                               | 84 (51.5)                    | 8 (15.7)                 | 45 (27.6)                    | 16 (31.4)                | 30 (18.4)                    | 1 (2.0)                  | 4 (2.5)                      |
| Remifentanil                                                 | 19 (37.3)                               | 53 (32.5)                    | 24 (47.1)                | 82 (50.3)                    | 8 (15.7)                 | 24 (14.7)                    | 0 (0)                    | 4 (2.5)                      |
| Ketamine                                                     | 0 (0)                                   | 1 (0.6)                      | 40 (78.4)                | 137 (84.1)                   | 10 (19.6)                | 18 (11.0)                    | 1 (2.0)                  | 7 (4.3)                      |
| Other                                                        | 0 (0)                                   | 3 (1.8)                      | 0 (0)                    | 9 (5.5)                      | -                        | -                            | 51 (100)                 | 151 (92.6)                   |
| <b>Sedative/analgesic delivery regimen:</b>                  |                                         |                              |                          |                              |                          |                              |                          |                              |
| Single sedative agent                                        | 7 (13.7)                                | 40 (24.5)                    | 39 (76.5)                | 103 (63.2)                   | 0 (0)                    | 4 (2.5)                      | 5 (9.8)                  | 16 (9.8)                     |
| Sedative(s) in combination with one or more analgesic agents | 50 (98.0)                               | 157 (96.3)                   | 1 (2.0)                  | 3 (1.8)                      | 0 (0)                    | 0 (0)                        | 0 (0)                    | 3 (1.8)                      |
| Multiple sedatives together                                  | 8 (15.7)                                | 15 (9.2)                     | 39 (76.5)                | 124 (76.1)                   | 1 (2.0)                  | 4 (2.5)                      | 3 (5.9)                  | 20 (12.3)                    |

PPS – point prevalence study

<sup>a</sup> n=51 units

<sup>b</sup> n=163 units

<sup>c</sup> For sedative purposes only
