# Supplementary material for: National survey and point prevalence study of sedation practice in UK critical care
Source: Springer Nature journal article supplement (doi:10.1186/s13054-016-1532-x), 2016-10-27
Supplement: MOESM14 [file 10996576]

Table S12 First choice of sedative agent reported in the national survey by units that did and did not participate in the point prevalence study

| <b>Sedative agent<sup>a</sup></b> | <b>Unit participated in the point prevalence study, n (%)</b> |                   |
|-----------------------------------|---------------------------------------------------------------|-------------------|
|                                   | <b>Yes (n=51)</b>                                             | <b>No (n=163)</b> |
| Propofol                          | 47 (92.2)                                                     | 142 (87.1)        |
| Midazolam                         | 3 (5.9)                                                       | 10 (6.1)          |
| Not reported                      | 1 (2.0)                                                       | 14 (8.6)          |

<sup>a</sup> Three units (all not participating in the point prevalence study) reported both propofol and midazolam as their first choice
