# Supplementary material for: National survey and point prevalence study of sedation practice in UK critical care
Source: Springer Nature journal article supplement (doi:10.1186/s13054-016-1532-x), 2016-10-27
Supplement: MOESM15 [file 10996576]

Table S13 First choice of analgesic agent reported in the national survey by units that did and did not participate in the point prevalence study

| <b>Analgesic agent<sup>a</sup></b> | <b>Unit participated in the point prevalence study, n (%)</b> |                   |
|------------------------------------|---------------------------------------------------------------|-------------------|
|                                    | <b>Yes (n=51)</b>                                             | <b>No (n=163)</b> |
| Morphine                           | 10 (19.6)                                                     | 32 (19.6)         |
| Fentanyl                           | 13 (25.5)                                                     | 43 (26.4)         |
| Alfentanil                         | 21 (41.2)                                                     | 64 (39.3)         |
| Remifentanil                       | 8 (15.7)                                                      | 24 (14.7)         |
| Paracetamol                        | 0 (0)                                                         | 1 (0.6)           |
| Not reported                       | 1 (2.0)                                                       | 6 (3.7)           |

<sup>a</sup> Five units (one participating in point prevalence study, four not participating in point prevalence study) reported both morphine and alfentanil as their first choice; two units (one participating in point prevalence study, one not participating in point prevalence study) reported both morphine and remifentanil as their first choice; one unit (not participating in point prevalence study) reported both morphine and fentanyl as their first choice; one unit (not participating in point prevalence study) reported both alfentanil and remifentanil as their first choice
