# Supplementary material for: National survey and point prevalence study of sedation practice in UK critical care
Source: Springer Nature journal article supplement (doi:10.1186/s13054-016-1532-x), 2016-10-27
Supplement: MOESM16 [file 10996576]

Table S14 First choice for delivery of sedation and analgesia in the national survey by units that did and did not participate in the point prevalence study

| <b>Sedative/analgesic delivery regimen</b>                   | <b>Unit participated in the point prevalence study, n (%)</b> |                   |
|--------------------------------------------------------------|---------------------------------------------------------------|-------------------|
|                                                              | <b>Yes (n=51)</b>                                             | <b>No (n=163)</b> |
| Single sedative agent                                        | 1 (2.0)                                                       | 8 (4.9)           |
| Sedative(s) in combination with one or more analgesic agents | 43 (84.3)                                                     | 134 (82.2)        |
| Multiple sedatives together                                  | 1 (2.0)                                                       | 1 (0.6)           |
| Not reported                                                 | 6 (11.8)                                                      | 20 (12.3)         |
