# Supplementary material for: National survey and point prevalence study of sedation practice in UK critical care
Source: Springer Nature journal article supplement (doi:10.1186/s13054-016-1532-x), 2016-10-27
Supplement: MOESM17 [file 10996576]

Table S15 Point prevalence study – characteristics, outcomes and length of stay of sedated and non-sedated patients with validated Case Mix Programme data (n=50 units)

|                                                                                | <b>Sedated<br/>(n=230)</b> | <b>Non-sedated<br/>(n=286)</b> |
|--------------------------------------------------------------------------------|----------------------------|--------------------------------|
| <b>Characteristic<sup>a</sup></b>                                              |                            |                                |
| Age, <i>mean (SD)</i>                                                          | 59.3 (16.3)                | 63.6 (14.8)                    |
| Gender, <i>n (%)</i>                                                           |                            |                                |
| Female                                                                         | 100 (43.5)                 | 124 (43.4)                     |
| Male                                                                           | 130 (56.5)                 | 162 (56.6)                     |
| Ethnicity, <i>n (%)</i> :                                                      |                            |                                |
| White                                                                          | 214 (94.7)                 | 261 (93.9)                     |
| Black or Black British                                                         | 4 (1.8)                    | 8 (2.9)                        |
| Asian or Asian British                                                         | 6 (2.7)                    | 5 (1.8)                        |
| Mixed                                                                          | 2 (0.9)                    | 0 (0.0)                        |
| Other ethnic group                                                             | 0 (0.0)                    | 4 (1.4)                        |
| Severe co-morbidities, <i>n (%)</i> :                                          |                            |                                |
| Liver co-morbidity                                                             | 10 (4.3)                   | 3 (1.0)                        |
| Renal co-morbidity                                                             | 3 (1.3)                    | 2 (0.7)                        |
| Respiratory co-morbidity                                                       | 5 (2.2)                    | 7 (2.4)                        |
| Cardiovascular co-morbidity                                                    | 2 (0.9)                    | 5 (1.7)                        |
| Haematological malignancy                                                      | 3 (1.3)                    | 4 (1.4)                        |
| Metastatic disease                                                             | 6 (2.6)                    | 6 (2.1)                        |
| Immunosuppression                                                              | 22 (9.5)                   | 28 (9.8)                       |
| Surgical status, <i>n (%)</i> :                                                |                            |                                |
| Elective/scheduled                                                             | 24 (10.4)                  | 46 (16.1)                      |
| Emergency/urgent                                                               | 44 (19.1)                  | 38 (13.3)                      |
| Non-surgical                                                                   | 162 (70.4)                 | 202 (70.6)                     |
| Primary/secondary reason for admission, <i>n (%)</i> :                         |                            |                                |
| Admissions following trauma                                                    | 31 (13.5)                  | 31 (10.8)                      |
| Admissions with neurological condition                                         | 25 (10.9)                  | 21 (7.5)                       |
| ICNARC Physiology Score, <i>mean (SD)</i>                                      | 22.7 (8.7)                 | 18.1 (8.3)                     |
| ICNARC model (2013 recalibration) predicted risk of death, <i>median (IQR)</i> | 0.30 (0.12, 0.52)          | 0.20 (0.05, 0.38)              |
| APACHE II Acute Physiology Score, <i>mean (SD)</i>                             | 13.6 (5.5)                 | 12.7 (5.5)                     |
| APACHE II Score, <i>mean (SD)</i>                                              | 17.7 (6.2)                 | 17.2 (6.0)                     |
| APACHE II (2013 recalibration) predicted risk of death, <i>median (IQR)</i>    | 0.23 (0.12, 0.41)          | 0.20 (0.09, 0.35)              |
| Mechanical ventilation – 1 <sup>st</sup> 24 hours, <i>n (%)</i>                | 181 (78.4)                 | 125 (43.7)                     |
| Time (days) since admission to critical care, <i>mean (SD)</i>                 | 6.9 (9.5)                  | 10.6 (15.5)                    |
| <b>Outcome<sup>b</sup> and length of stay<sup>c</sup></b>                      |                            |                                |
| Deaths – critical care, <i>n (%)</i>                                           | 58 (25.2)                  | 22 (7.7)                       |
| Deaths – acute hospital <sup>d</sup> , <i>n (%)</i>                            | 74 (33.6)                  | 47 (17.8)                      |
| LOS (days) – critical care, <i>mean (SD)</i>                                   |                            |                                |
| Survivors                                                                      | 17.6 (16.4)                | 17.1 (21.5)                    |
| Non-survivors                                                                  | 17.0 (18.6)                | 16.0 (16.9)                    |
| LOS (days) – critical care, <i>median (IQR)</i>                                |                            |                                |
| Survivors                                                                      | 12.7 (5.8, 25.3)           | 8.0 (3.4, 21.2)                |
| Non-survivors                                                                  | 10.4 (6.1, 23.5)           | 10.6 (1.8, 25.4)               |
| LOS (days) – acute hospital, <i>mean (SD)</i>                                  |                            |                                |
| Survivors                                                                      | 43.7 (35.2)                | 41.0 (46.5)                    |
| Non-survivors                                                                  | 24.9 (22.8)                | 40.5 (42.2)                    |
| LOS (days) – acute hospital, <i>median (IQR)</i>                               |                            |                                |
| Survivors                                                                      | 33 (16, 62)                | 24 (11, 59)                    |
| Non-survivors                                                                  | 19 (9, 32)                 | 27 (9, 58)                     |

SD: standard deviation; ICNARC: Intensive Care National Audit & Research Centre; IQR: interquartile range; APACHE: Acute Physiology And Chronic Health Evaluation; LOS: length of stay

- <sup>a</sup> Case mix was assessed by: age; sex; ethnicity; severe co-morbidities; surgical status; primary/secondary reason for unit admission; acute severity of illness; and time since admission to the critical care unit
- <sup>b</sup> Outcome was assessed by mortality at unit and acute hospital discharge
- <sup>c</sup> Length of stay was assessed both in the unit and for the total stay in an acute hospital and was stratified by outcome
- <sup>d</sup> Acute hospital outcomes missing for 32 patients (10 sedated, 22 non-sedated) at the point of data lock
